# Supplementary material for: Adsorption Behaviors of Cationic Methylene Blue and Anionic Reactive Blue 19 Dyes onto Nano-Carbon Adsorbent Carbonized from Small Precursors
Source: MDPI journal article supplement (doi:10.3390/nano12111814), 2022-05-25
Supplement: s1 [file s1]

## Supplementary Material

### **Adsorption behaviors of cationic methylene blue and anionic reactive blue 19 dyes onto nano-carbon adsorbent carbonized from small precursors**

Caizhen Liang, Qingshan Shi, Jin Feng, Junwei Yao, Hui Huang, Xiaobao Xie\*

<sup>1</sup> *Institute of Microbiology, Guangdong Academy of Sciences, State Key Laboratory of Applied Microbiology Southern China, Guangdong Provincial Key Laboratory of Microbial Culture Collection and Application, Guangdong Open Laboratory of Applied Microbiology, Guangzhou 510070, PR China*

Corresponding author:

\* Xiaobao Xie

Email address: xiexb@gdim.cn, Tel: +86 20 37656986

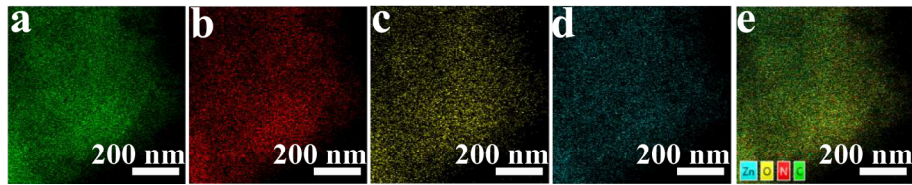

**Figure S1.** The TEM EDS spectrum of N-CM: (a) C, (b) N, (c) O, and (d) Zn elements, and (e) the overlay image of these four elements.

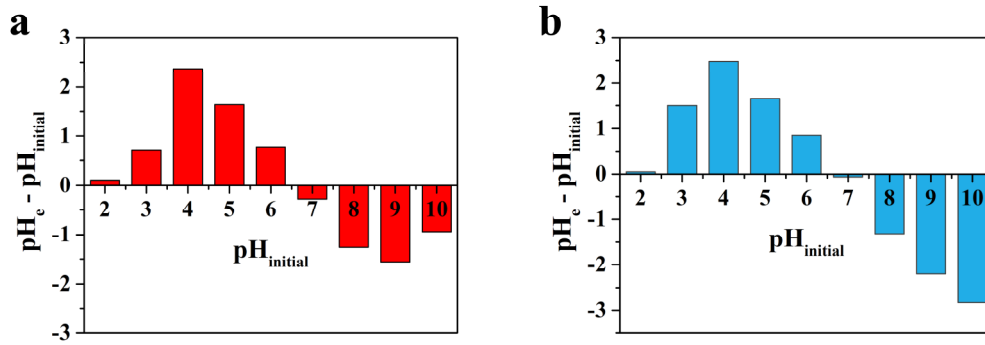

**Figure S2.** The pH variations between equilibrium and initiate pHs for (a) MB and (b) RB19 adsorption.

**Table S1.** Comparison of several absorbents toward MB and RB19 dye adsorption.

| Adsorbate | Adsorbent                          | Synthetic Condition                                                                                                      | Working Environment | Maximum Adsorption Capacity (mg/g) | Reference |
|-----------|------------------------------------|--------------------------------------------------------------------------------------------------------------------------|---------------------|------------------------------------|-----------|
| MB        | Electrolytic manganese anode slime | Hydroxylation of electrolytic manganese anode slime with EDTA-2Na                                                        | pH = 6.0            | 78.43 mg/g                         | [8]       |
| MB        | Biochar                            | Pyrolysis of mixed municipal discarded material at 300 °C                                                                | pH = 5 at 30 °C     | 7.2 mg/g                           | [24]      |
| MB        | Mesoporous Ni-C-N/silica aerogel   | Impregnation of cationic [Ni(trpa)] <sup>2+</sup> complex onto silica aerogel followed by thermal treatment (200-600 °C) | pH = 4-10 at 30 °C  | 115 mg/g                           | [28]      |
| MB        | Lignocellulose hydrogel            | Dissolution-regeneration of lemon peel and its microcrystalline cellulose                                                | Aqueous solution    | 57.54 mg/g                         | [50]      |
| MB        | Cellulose-rich modified rice husk  | Steam explosion and NaOH treatment                                                                                       | pH = 7.0            | 50.15 mg/g                         | [52]      |

|      |                                                                           |                                                                                                                                 |                                        |                   |                  |
|------|---------------------------------------------------------------------------|---------------------------------------------------------------------------------------------------------------------------------|----------------------------------------|-------------------|------------------|
| MB   | Fe <sub>3</sub> O <sub>4</sub> -loaded biochar                            | Oxygen-limited pyrolysis of FeCl <sub>3</sub> -impregnated sorghum straw biomass                                                | Aqueous solution                       | 66.95/156.37 mg/g | [53]             |
| MB   | Mesoporous magnetic MnFe <sub>2</sub> O <sub>4</sub> @CS-SiO <sub>2</sub> | Multi-chemical reactions containing hydrothermal synthesis                                                                      | pH = 7.0 at 30 °C                      | 179.25 mg/g       | [54]             |
| MB   | Ti <sub>3</sub> C <sub>2</sub> MXene@Fe <sub>3</sub> O <sub>4</sub>       | Ti <sub>3</sub> C <sub>2</sub> MXene functionalized with magnetic Fe <sub>3</sub> O <sub>4</sub> via an in situ growth approach | pH = 3/11 at 55 °C                     | 11.68 mg/g        | [55]             |
| MB   | Mesoporous nitrogen-doped carbon material                                 | Solvothermal treatment at 150 °C                                                                                                | Natural MB aqueous solution at 25 °C   | 120.77 mg/g       | <b>This work</b> |
| RB19 | Borax cross-linked Jhingan hydrogel                                       | Borax cross-linked Jhingan hydrogel                                                                                             | pH = 6 at 45 °C                        | 9.88 mg/g         | [7]              |
| RB19 | Sewage sludge biochar                                                     | Pyrolysis at 450 °C                                                                                                             | pH = 10                                | 126.59 mg/g       | [56]             |
| RB19 | Bone char                                                                 | Preparation from bovine bone using CO <sub>2</sub> atmosphere at 451 °C                                                         | pH = 6.54                              | 20.6 mg/g         | [57]             |
| RB19 | Mesoporous activated carbon                                               | Pyrolysis of industrial laundry sewage sludge at 750-800 °C followed by physical activation with CO <sub>2</sub>                | pH = 2.0                               | 33.47 mg/g        | [58]             |
| RB19 | Dried Aspergillus tubingensis                                             | Isolation from filamentous fungus                                                                                               | pH = 2                                 | 143.0 mg/g        | [59]             |
| RB19 | Nano-carbon adsorbent                                                     | Solvothermal treatment at 150 °C                                                                                                | natural RB19 aqueous solution at 25 °C | 116.01 mg/g       | <b>This work</b> |

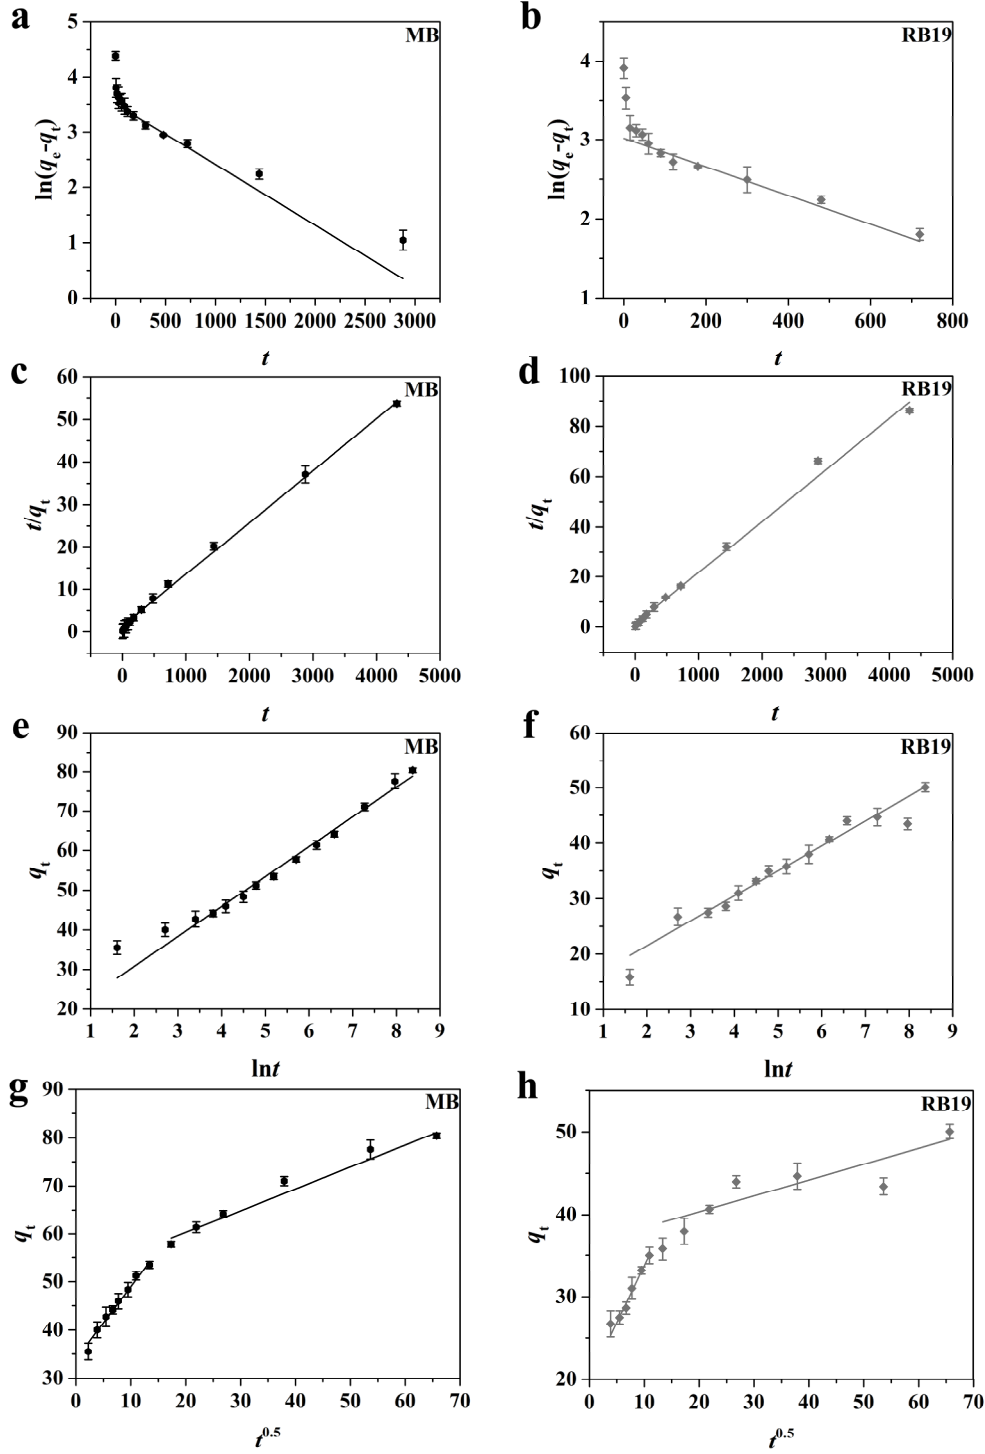

**Figure S3.** Kinetic curves for MB and RB dyes onto N-CMs (linear fitting): (a,b) Pseudo-first order kinetic fitted plot, (c,d) Pseudo-second order kinetic fitted plot, (e,f) Elovich model, and (g,h) Intra-particle diffusion model.

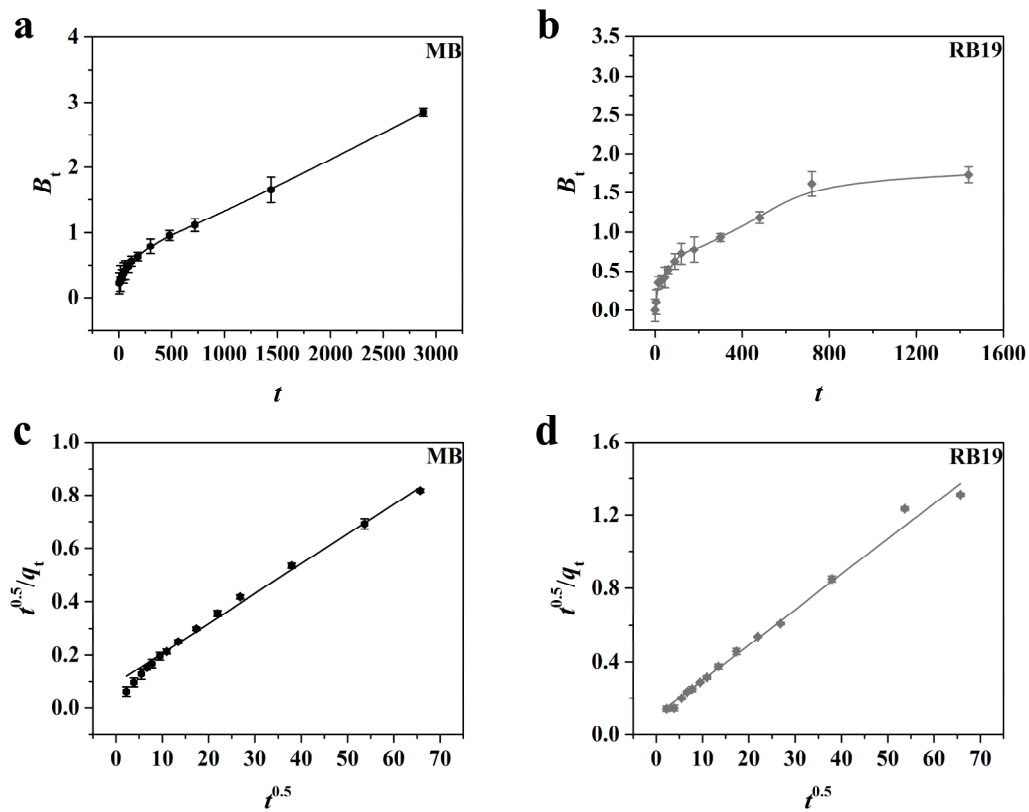

**Figure S4.** Boyd plots for (a) MB and (b) RB dye adsorption, and the linearly fitted diffusion-chemisorption model for (c) MB and (d) dye adsorption.

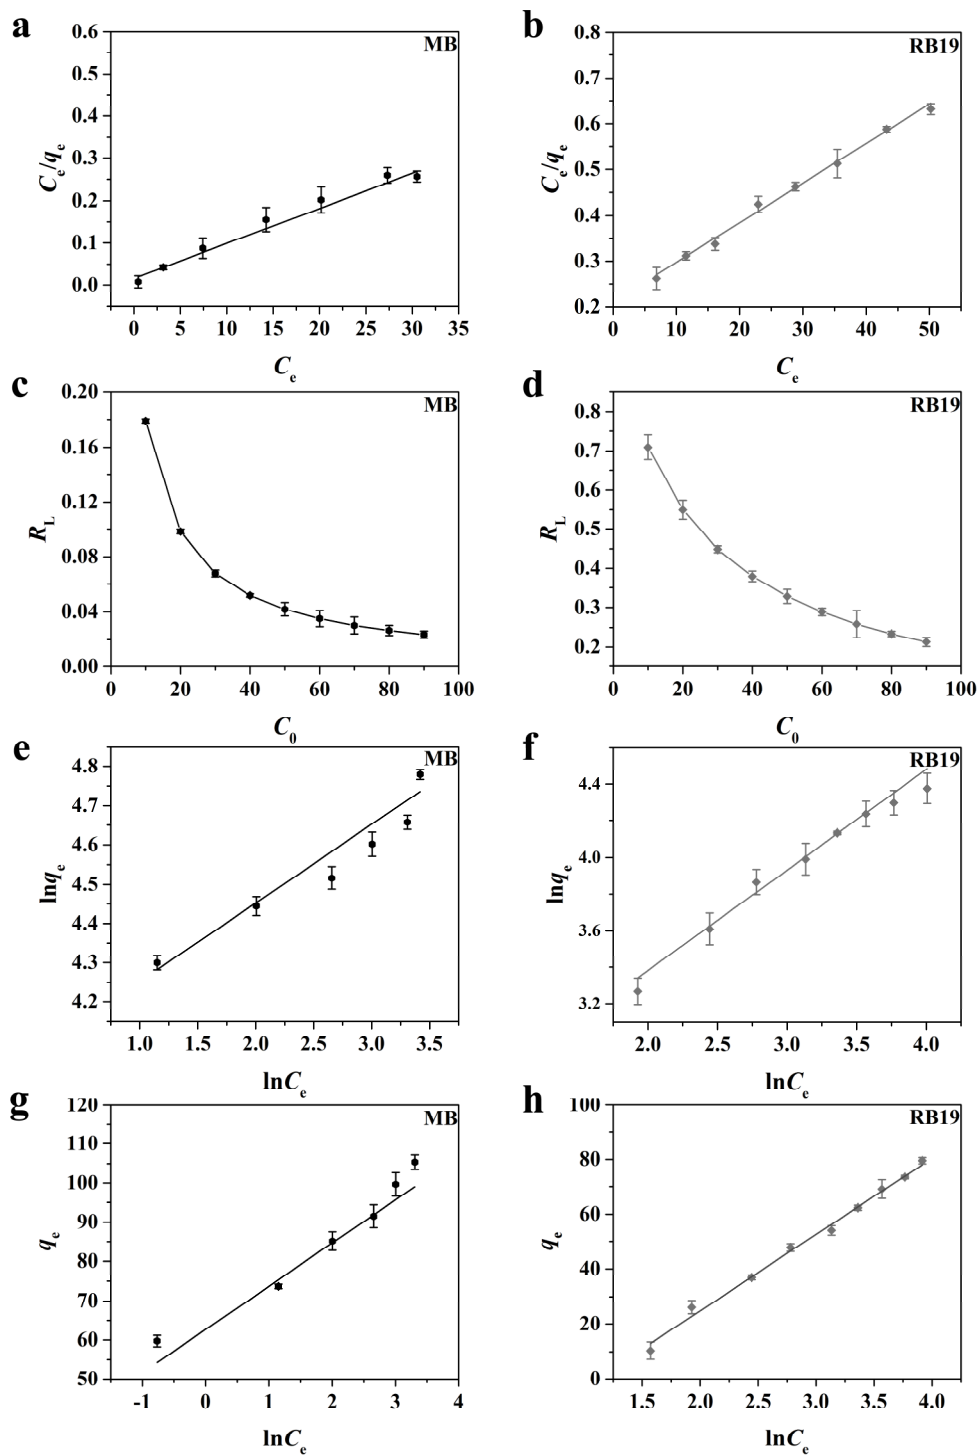

**Figure S5.** Adsorption isotherm curves for MB and RB dyes onto N-CMs: (a,b) Langmuir isotherm fitted plots (linear fitting), (c,d) plots of  $R_L$  with initial concentration, (e,f) Freundlich isotherm fitted plots (linear fitting), and (g,h) Temkin isotherm fitted plots (linear fitting).

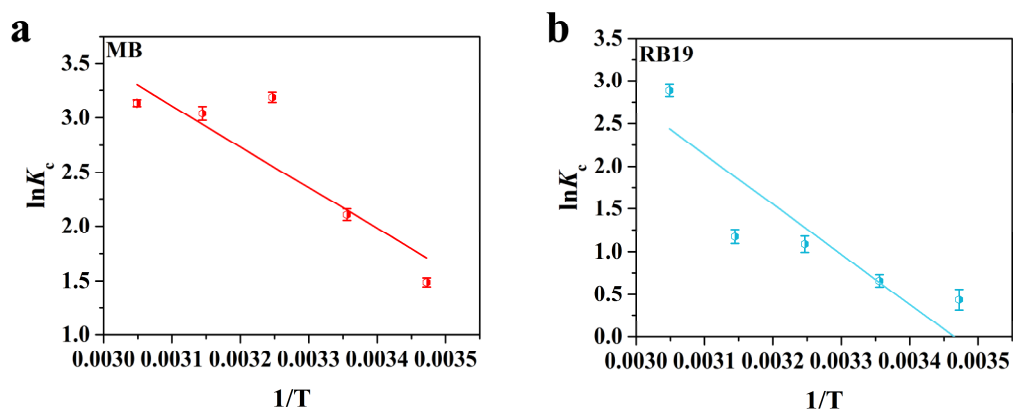

Figure S6. The plots of  $\ln K_c$  versus  $1/T$  for adsorption of (a) MB and (b) RB dyes onto N-CMs.

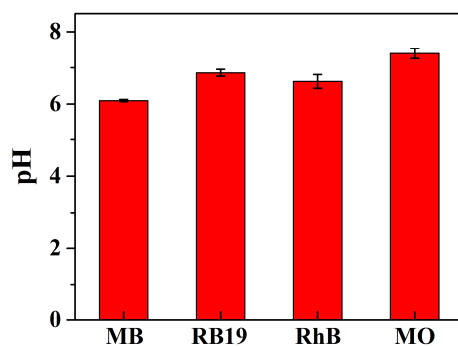

Figure S7. The pH of dye aqueous solution.

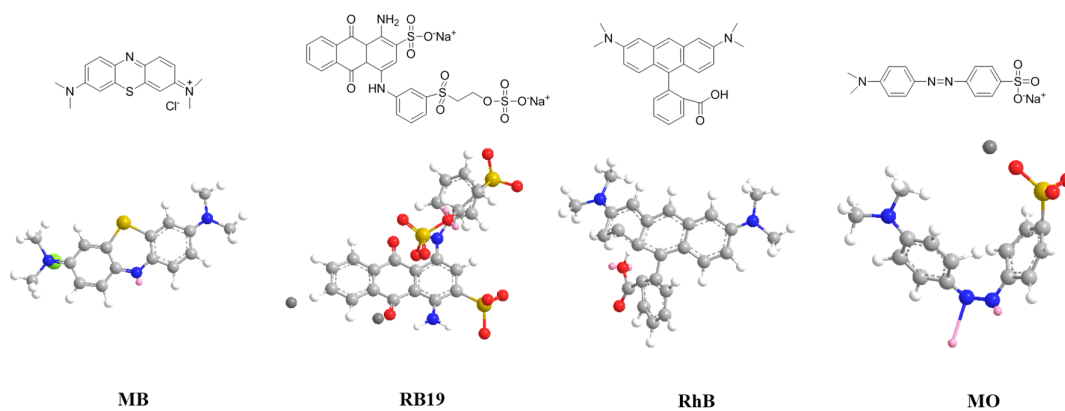

Figure S8. The structures of MB, RB, RhB and MO dyes.

## References

7. Mate, C. J.; Mishra, S., Synthesis of borax cross-linked Jhingan gum hydrogel for remediation of Remazol Brilliant Blue R (RBBR) dye from water: Adsorption isotherm, kinetic, thermodynamic and biodegradation studies. *Int. J. Biol. Macromol.* **2020**, *151*, 677–690.
8. Su, P.; Wan, Q.; Yang, Y.; Shu, J.; Zhao, H.; Meng, W.; Li, B.; Chen, M.; Liu, Z.; Liu, R., Hydroxylation of electrolytic manganese anode slime with EDTA-2Na and its adsorption of methylene blue. *Sep. Purif. Technol.* **2021**, *278*, 119526.
24. Hoslett, J.; Ghazal, H.; Mohamad, N.; Jouhara, H., Removal of methylene blue from aqueous solutions by biochar prepared from the pyrolysis of mixed municipal discarded material. *Sci. Total Environ.* **2020**, *714*, 136832.
28. Dai, C.; Zhang, M.; Guo, X.; Ma, X., Mesoporous composite Ni-C-N/SA for selective adsorption of methylene blue from water. *Chem. Eng. J.* **2021**, *407*, 127181.
50. Dai, H.; Chen, Y.; Ma, L.; Zhang, Y.; Cui, B., Direct regeneration of hydrogels based on lemon peel and its isolated microcrystalline cellulose: Characterization and application for methylene blue adsorption. *Int. J. Biol. Macromol.* **2021**, *191*, 129–138.
52. You, X.; Wang, R.; Zhu, Y.; Sui, W.; Cheng, D., Comparison of adsorption properties of a cellulose-rich modified rice husk for the removal of methylene blue and aluminum(III) from their aqueous solution. *Ind. Crop. Prod.* **2021**, *170*, 113687.
53. Xie, J.; Lin, R.; Liang, Z.; Zhao, Z.; Yang, C.; Cui, F., Effect of cations on the enhanced adsorption of cationic dye in Fe<sub>3</sub>O<sub>4</sub>-loaded biochar and mechanism. *J. Environ. Chem. Eng.* **2021**, *9*, 105744.
54. Liu, Z.; Chen, G.; Hu, F.; Li, X., Synthesis of mesoporous magnetic MnFe<sub>2</sub>O<sub>4</sub>@CS-SiO<sub>2</sub> microsphere and its adsorption performance of Zn<sup>2+</sup> and MB studies. *J. Environ. Manage.* **2020**, *263*, 110377.
55. Zhang, P.; Xiang, M.; Liu, H.; Yang, C.; Deng, S., Novel two-dimensional magnetic titanium carbide for methylene blue removal over a wide pH range: Insight into removal performance and mechanism. *ACS Appl. Mater. Interfaces* **2019**, *11*, 24027–24036.
56. Raj, A.; Yadav, A.; Rawat, A. P.; Singh, A. K.; Kumar, S.; Pandey, A. K.; Sirohi, R.; Pandey, A., Kinetic and thermodynamic investigations of sewage sludge biochar in removal of Remazol Brilliant Blue R dye from aqueous solution and evaluation of residual dyes cytotoxicity. *Environ. Technol. Inno.* **2021**, *23*, 101556.
57. Bedin, K. C.; de Azevedo, S. P.; Leandro, P. K. T.; Cazetta, A. L.; Almeida, V. C., Bone char prepared by CO<sub>2</sub> atmosphere: Preparation optimization and adsorption studies of Remazol Brilliant Blue R. *J. Clean. Prod.* **2017**, *161*, 288–298.
58. Silva, T. L.; Ronix, A.; Pezoti, O.; Souza, L. S.; Leandro, P. K. T.; Bedin, K. C.; Beltrame, K. K.; Cazetta, A. L.; Almeida, V. C., Mesoporous activated carbon from industrial laundry sewage sludge: Adsorption studies of reactive dye Remazol Brilliant Blue R. *Chem. Eng. J.* **2016**, *303*, 467–476.
59. Karatay, S. E.; Aksu, Z.; Özeren, İ.; Dönmez, G., Potentiality of newly isolated *Aspergillus tubingensis* in biosorption of textile dyes: equilibrium and kinetic modeling. *Biomass Conv. Bioref.* **2021**, *155*, 1–8.
